# Supplementary material for: Medical students’ acceptance and use of the Wi-Fi system at hostels as a learning tool: an investigation based on the 'unified theory of acceptance and use of technology'
Source: Research Square preprint supplement (doi:10.21203/rs.3.rs-4732428/v1), 2024-07-18
Supplement: Supplementary file 1 [file 0bbc01008cac30979781e705.docx]

**Medical Students’ acceptance and use of Wi-Fi system at hostels as a learning tool: an investigation based on the ‘unified theory of acceptance and use of technology (UTAUT)’ model**

The purpose of this online survey is to find out the factors that might facilitate or hinder the adaptation of Wi-Fi facility at hostels for learning purposes. Please read the information sheet before answering the questions and also kind enough to submit consent form with this questionnaire.

Please read and answer every question presented below.

| Gender | Male | Female |
| --- | --- | --- |

| Age (in years) | Male |  |
| --- | --- | --- |

| The current year of the study | 1st | 2nd | 3rd | 4th | Final |
| --- | --- | --- | --- | --- | --- |

For questions below, please mark the number that best describes your agreement or disagreement with each statement.

| 1 | 2 | 3 | 4 | 5 |
| --- | --- | --- | --- | --- |
| Strongly Disagree | Disagree | Neutral | Agree | Strongly  Agree |

|  | PE_01: I find hostel Wi-Fi system useful in my learning. | 1 | 2 | 3 | 4 | 5 |
| --- | --- | --- | --- | --- | --- | --- |
|  | PE_02: Using hostel Wi-Fi system enables me to accomplish learning task more quickly. | | | | | |
|  |  | 1 | 2 | 3 | 4 | 5 |
|  |  |  |  |  |  |  |
|  | PE_03: Using hostel Wi-Fi system increases my learning productivity. | 1 | 2 | 3 | 4 | 5 |
|  |  | | | | | |
|  |  | | | | | |
|  | EE_01: I am skillful at using the hostel Wi-Fi system for learning. | 1 | 2 | 3 | 4 | 5 |
|  |  |  |  |  |  |  |
|  | EE_02: I find the hostel Wi-Fi system easy to use for learning. | 1 | 2 | 3 | 4 | 5 |
|  |  | | | | | |
|  | EE_03: It is easy to learn how to use hostel Wi-Fi facility for learning. | 1 | 2 | 3 | 4 | 5 |

|  | SI1: People who influence my behavior think I should use the faculty Wi-Fi system for leaning. | | | | | |
| --- | --- | --- | --- | --- | --- | --- |
|  |  | 1 | 2 | 3 | 4 | 5 |
|  | SI2: People who are important to me think that I should use the faculty Wi-Fi system for leaning. | | | | | |
|  |  | 1 | 2 | 3 | 4 | 5 |
|  | SI3: Teachers in the faculty are helpful in the use of the faculty Wi-Fi system for leaning. | | | | | |
|  |  | 1 | 2 | 3 | 4 | 5 |
|  | |  |  |  |  |  |
|  | FC1: I have the resources necessary to use the faculty Wi-Fi system. | 1 | 2 | 3 | 4 | 5 |
|  |  |  |  |  |  |  |
|  | FC2: I have the knowledge necessary to use the faculty Wi-Fi system. | 1 | 2 | 3 | 4 | 5 |
|  |  | | | | | |
|  | FC3: Faculty Wi-Fi system is similar to other systems I use. | 1 | 2 | 3 | 4 | 5 |
|  | BI1: I intend to use the faculty Wi-Fi system in the future. | 1 | 2 | 3 | 4 | 5 |
|  |  |  |  |  |  |  |
|  | B12: I think I would use the faculty Wi-Fi system in the future. | 1 | 2 | 3 | 4 | 5 |
|  |  | | | | | |
|  | B13: I plan to use the faculty Wi-Fi system in the future. | 1 | 2 | 3 | 4 | 5 |

|  | |  |  |  |  |  |
| --- | --- | --- | --- | --- | --- | --- |
|  | USE1: I frequently use the faculty Wi-Fi system. | 1 | 2 | 3 | 4 | 5 |
|  |  |  |  |  |  |  |
|  | USE2: I use the faculty Wi-Fi system on a regular basis. | 1 | 2 | 3 | 4 | 5 |
|  |  | | | | | |
|  | USE3: I do most learning tasks by using the faculty Wi-Fi system. | 1 | 2 | 3 | 4 | 5 |

*Thank you for giving your responses.*
