# Supplementary material for: Medical students’ acceptance and use of the Wi-Fi system at hostels as a learning tool: an investigation based on the 'unified theory of acceptance and use of technology'
Source: Research Square preprint supplement (doi:10.21203/rs.3.rs-4732428/v1), 2024-07-18
Supplement: Supplementary file 2 [file d3630a715eefa940d453e356.docx]

**Additional file 1**

1. **File name**

Supplementary material 1

1. **File format**

.docx

1. **Title of data**

Supplementary material 1 – Questionnaire items in this study

1. **Description of data**

Questions to collect students’ demographic information and Likert scale questions to assess the UTAUT model

**v Title of the manuscript**

Medical students’ acceptance and use of the Wi-Fi system at hostels as a learning tool: an investigation based on the ‘unified theory of acceptance and use of technology’

**vi Author list**

Samankumara Hettige, Indrajith Solangaarahchi and Dileepa Senajith Ediriweera

**Additional file 2**

1. **File name**

Supplementary material 2

1. **File format**

.CSV

1. **Title of data**

Supplementary material 2 - Dataset

1. **Description of data**

The dataset used to get the conclusions of this study.

**v Title of the manuscript**

Medical students’ acceptance and use of the Wi-Fi system at hostels as a learning tool: an investigation based on the ‘unified theory of acceptance and use of technology’

**vi Author list**

Samankumara Hettige, Indrajith Solangaarahchi and Dileepa Senajith Ediriweera
